# Supplementary material for: Outpatient Antibiotic Dispensing for the Population with Government Health Insurance in Syria in 2018–2019
Source: MDPI journal article supplement (doi:10.3390/antibiotics9090570), 2020-09-02
Supplement: s1 [file s1]

**Supplementary Materials:**

Table S1: The number of patients in this study according to sex and age groups.

| <b>Age group (years)</b> | <b>Female</b> | <b>Male</b> | <b>Total</b> |
|--------------------------|---------------|-------------|--------------|
| 18-29                    | 3,036         | 500         | 3,536        |
| 30-39                    | 6,994         | 2,187       | 9,181        |
| 40-49                    | 5,620         | 3,470       | 9,090        |
| 50-59                    | 4,997         | 3,103       | 8,100        |
| 60-69                    | 1,533         | 1,234       | 2,767        |
| 70-79                    | 188           | 519         | 707          |
| 80<=                     | 15            | 48          | 63           |
| Total                    | 22,383        | 11,061      | 33,444       |
